# Supplementary material
Source: Springer Nature journal article supplement (https://www.springermedizin.de/resource/supplementary/12913_2013_3168_MOESM1_ESM.pdf/9532566)
Supplement: MOESM1 [file 9532566]

Abstracts identified from search strategy  
N=1204



Abstracts remaining after removal of  
duplicates  
N=817



Articles for full review after application of  
inclusion & exclusion criteria to abstracts  
N=802



Articles deem ineligible after full review  
N=765

\*Reasons for exclusion:

Not validation studies  
(N = 608)

Did not use administrative health data  
(N = 466)

Did not conduct separate pediatric analysis  
(N = 216)



Number of articles added after review of  
reference lists  
N=1



Final number of articles included in  
scoping review  
N=37
